# Supplementary material
Source: publisher site journal article supplement (https://www.dovepress.com/article/435954)

**Supplementary Figure1. Trend of the palliative care utilization among hospitalized patients with COPD from 2007 to 2018 in Taiwan using primary COPD diagnosis code.**


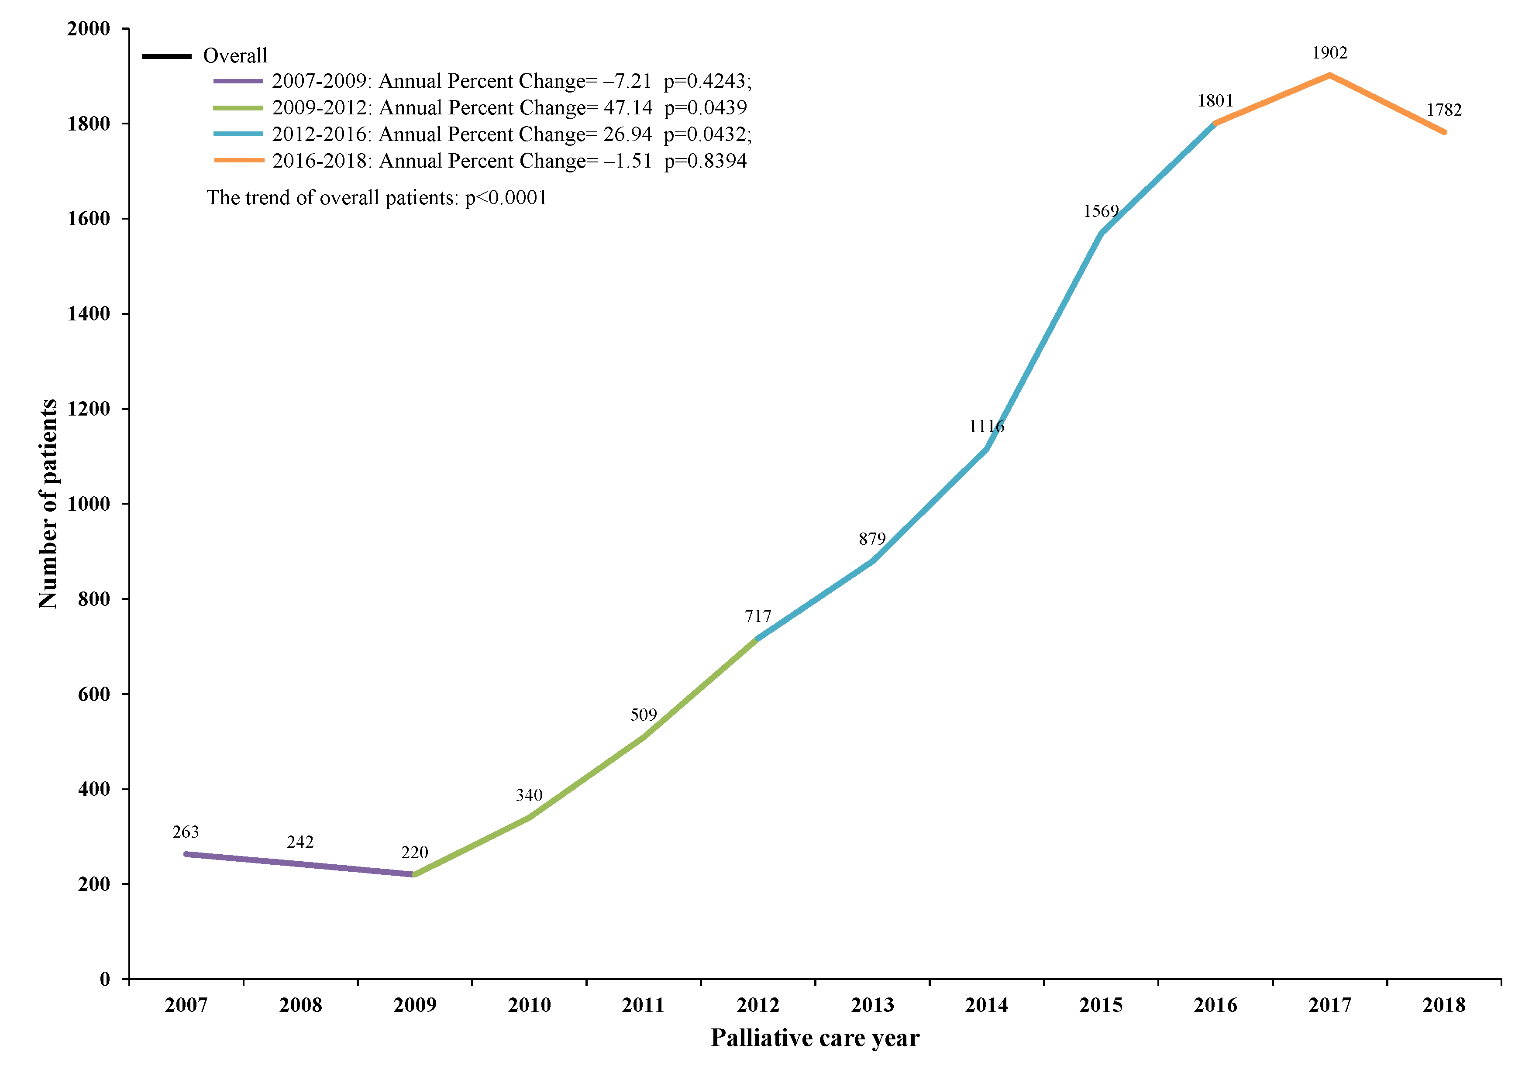


**Supplementary Figure2. Trend of palliative care timing during the period of five years prior to patients’ first utilization of palliative care using primary COPD diagnosis code.**


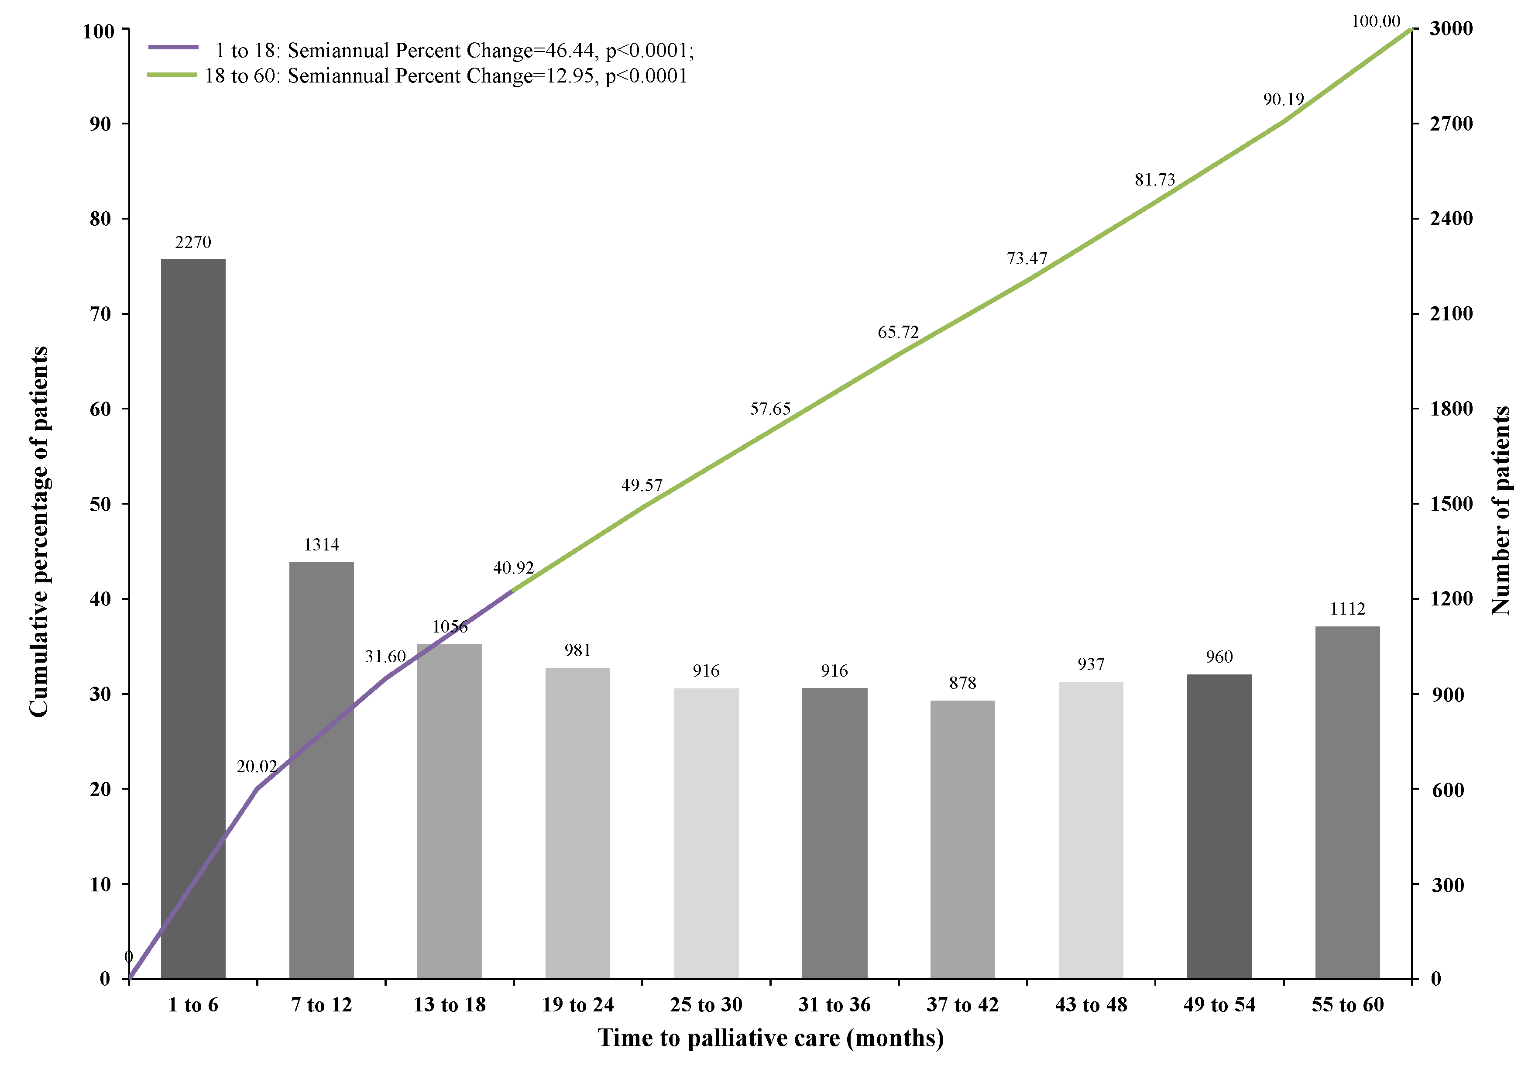

Supplement: Supplementary file 1 [file get_supplementary_file.php]
